# Supplementary material
Source: PubMed Central journal article supplement (PMC9869401)
Supplement: EIJ-D-22-00725_Hausleiter_SD.pdf [file EIJ-D-22-00725_Hausleiter_SD.pdf]

## Supplementary data

**Supplementary Table 1. MitraScore.**

| <i>Variable</i>                                                  | <i>Points</i>  |
|------------------------------------------------------------------|----------------|
| <i>Anemia</i>                                                    | <i>1 point</i> |
| <i>Glomerular filtrate rate &lt;60 mL/min/1.73 m<sup>2</sup></i> | <i>1 point</i> |
| <i>Left ventricular ejection fraction &lt;40%</i>                | <i>1 point</i> |
| <i>Peripheral artery disease</i>                                 | <i>1 point</i> |
| <i>Chronic obstructive pulmonary disease</i>                     | <i>1 point</i> |
| <i>High diuretic dose</i>                                        | <i>1 point</i> |
| <i>No therapy with renin-angiotensin system inhibitors</i>       | <i>1 point</i> |

**Supplementary Table 2. Anatomic exclusion criteria of the EVEREST II trial.**

*Anatomic exclusion criteria of the EVEREST II trial*

*Primary regurgitant jet outside from A2 and P2 segments of the mitral valve*

*Leaflet flail Width  $\geq 15$  mm*

*Leaflet flail Gap  $\geq 10$  mm*

*Leaflet tethering with coaptation Length  $< 2$  mm*

*Leaflet anatomy which may preclude clip implantation, proper clip positioning on the leaflets or sufficient reduction in MR*

*Evidence of calcification in the grasping area of the A2 and/or P2 scallops*

*Presence of a significant cleft of A2 or P2 scallops*

*Bileaflet flail or severe bileaflet prolapse (such as in Barlow disease)*

*Lack of both primary and secondary chordal support*

*Prior mitral valve leaflet surgery or any currently implanted mechanical prosthetic mitral valve*

*Mitral valve orifice area  $< 4.0$  cm<sup>2</sup>*

*Echocardiographic evidence of intracardiac mass, thrombus or vegetation*

*Active endocarditis or active rheumatic heart disease or leaflets degenerated from rheumatic diseased*

*Primary regurgitant jet outside from A2 and P2 segments of the mitral valve*

---

*MR, mitral regurgitation.*
